# Supplementary material for: Benzylserine inhibits breast cancer cell growth by disrupting intracellular amino acid homeostasis and triggering amino acid response pathways
Source: PubMed Central journal article supplement (PMC6019833; doi:10.1186/s12885-018-4599-8), 2018-06-26
Supplement: 12885_2018_4599_MOESM1_ESM.pdf [file 12885_2018_4599_MOESM1_ESM.pdf]

**Table S1.** Summary of [<sup>3</sup>H]-L-glutamine and [<sup>3</sup>H]-L-leucine uptake IC<sub>50</sub> values for breast cancer cells treated with varying concentrations of BenSer.

| Cell line        | <sup>3</sup> H]-L-glutamine IC <sub>50</sub> |         |         |         | <sup>3</sup> H]-L-leucine IC <sub>50</sub> |         |         |        |
|------------------|----------------------------------------------|---------|---------|---------|--------------------------------------------|---------|---------|--------|
|                  | MCF-7                                        | HCC1806 | MDA-231 | MCF10a  | MCF-7                                      | HCC1806 | MDA-231 | MCF10a |
| IC <sub>50</sub> | 37.85                                        | 17.19   | 15.37   | 3.901   | 3.789                                      | 2.87    | 3.001   | 17.63  |
| Span (%)         | = 100                                        | = 91.81 | = 80.01 | = 65.15 | = 93.74                                    | = 97.71 | = 98.58 | = 100  |

**Supplementary Table 2.** Summary of Kruskal-Wallis tests with Dunn’s multiple comparisons correction on inter-subtype comparisons of gene expression (mRNA log<sub>2</sub> values) of putative BenSer targets *SLC7A5*, *SLC3A2*, *SLC7A8*, *SLC1A5*, *SLC1A4*, *SLC38A1*, and *SLC38A2* in the METABRIC dataset (n=2509). Data were grouped into the “PAM50 + Claudin-low” subtypes based on clinical attribute data retrieved from [www.cbioportal.org/](http://www.cbioportal.org/). \*p < 0.05, \*\*p < 0.01, \*\*\*p < 0.001, \*\*\*\*p < 0.0001, ns=not significant.

| Subtype comparison pairs  | Gene          |               |               |                |                |               |               |                |                |
|---------------------------|---------------|---------------|---------------|----------------|----------------|---------------|---------------|----------------|----------------|
|                           | <i>SLC7A5</i> | <i>SLC3A2</i> | <i>SLC7A8</i> | <i>SLC43A1</i> | <i>SLC43A2</i> | <i>SLC1A4</i> | <i>SLC1A5</i> | <i>SLC38A1</i> | <i>SLC38A2</i> |
| Basal vs. HER2            | ****          | ns            | ****          | ns             | **             | ****          | **            | ****           | ****           |
| Basal vs. Luminal A       | ****          | ***           | ****          | ****           | ****           | ****          | ****          | ****           | ns             |
| Basal vs. Luminal B       | ****          | ns            | ****          | *              | ****           | ****          | ns            | ****           | **             |
| Basal vs. Normal          | ****          | ns            | ****          | **             | ***            | ****          | ****          | ****           | *              |
| Claudin-low vs. HER2      | ***           | ns            | ****          | ns             | ****           | ****          | ****          | ****           | *              |
| Claudin-low vs. Luminal A | ****          | ***           | ****          | ****           | ****           | ****          | ns            | ****           | ns             |
| Claudin-low vs. Luminal B | **            | ns            | ****          | ns             | ****           | ****          | ****          | ****           | ns             |
| Claudin-low vs. Normal    | ***           | ns            | ****          | *              | ****           | ****          | ns            | ****           | ns             |
| HER2 vs. Luminal A        | ****          | ns            | ****          | **             | ns             | ns            | ****          | ns             | ****           |
| HER2 vs. Luminal B        | ****          | **            | ****          | ns             | ****           | ns            | ****          | ns             | ****           |
| HER2 vs. Normal           | ****          | ns            | ns            | ns             | ns             | ns            | ****          | ns             | *              |
| Luminal A vs. Luminal B   | ****          | ****          | ***           | ns             | ns             | ns            | ****          | ns             | ns             |
| Luminal A vs. Normal      | ***           | ns            | ***           | ns             | ns             | ns            | ns            | ns             | ns             |
| Luminal B vs. Normal      | ns            | ns            | ns            | ns             | *              | ns            | ****          | ns             | ns             |
