# Supplementary material for: Benzylserine inhibits breast cancer cell growth by disrupting intracellular amino acid homeostasis and triggering amino acid response pathways
Source: PubMed Central journal article supplement (PMC6019833; doi:10.1186/s12885-018-4599-8), 2018-06-26

# Figure S1

## A

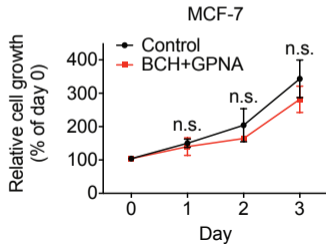

## B

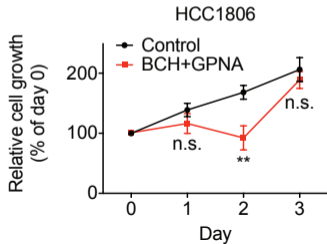

# Supplementary Figure 2

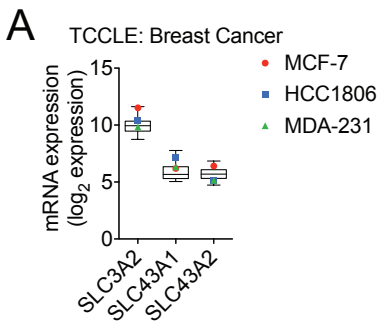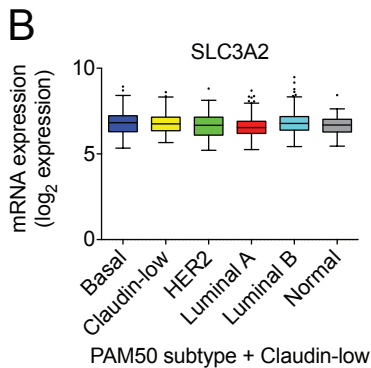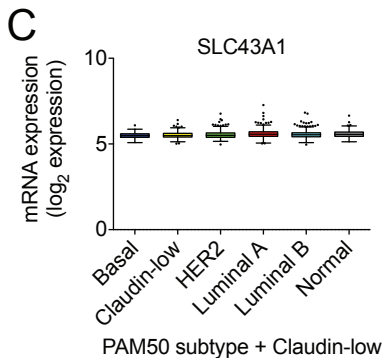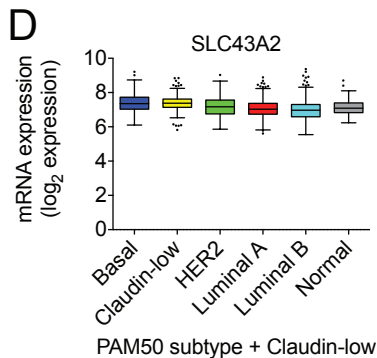

# Supplementary Figure 3

## A

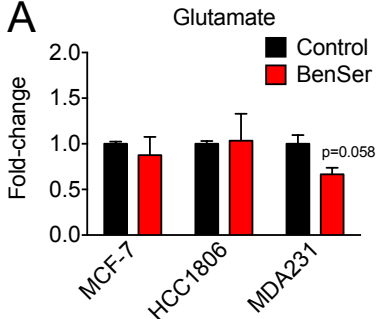

## B

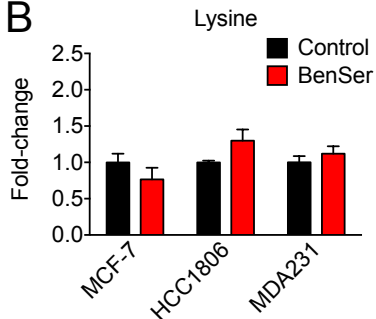

## C

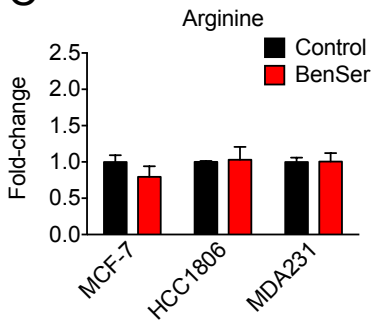

## D

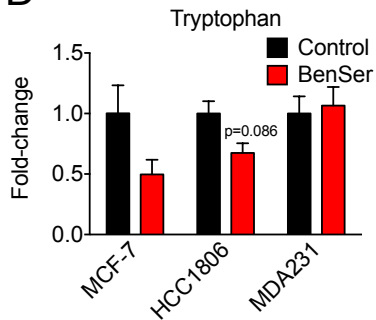

# Supplementary Figure 4

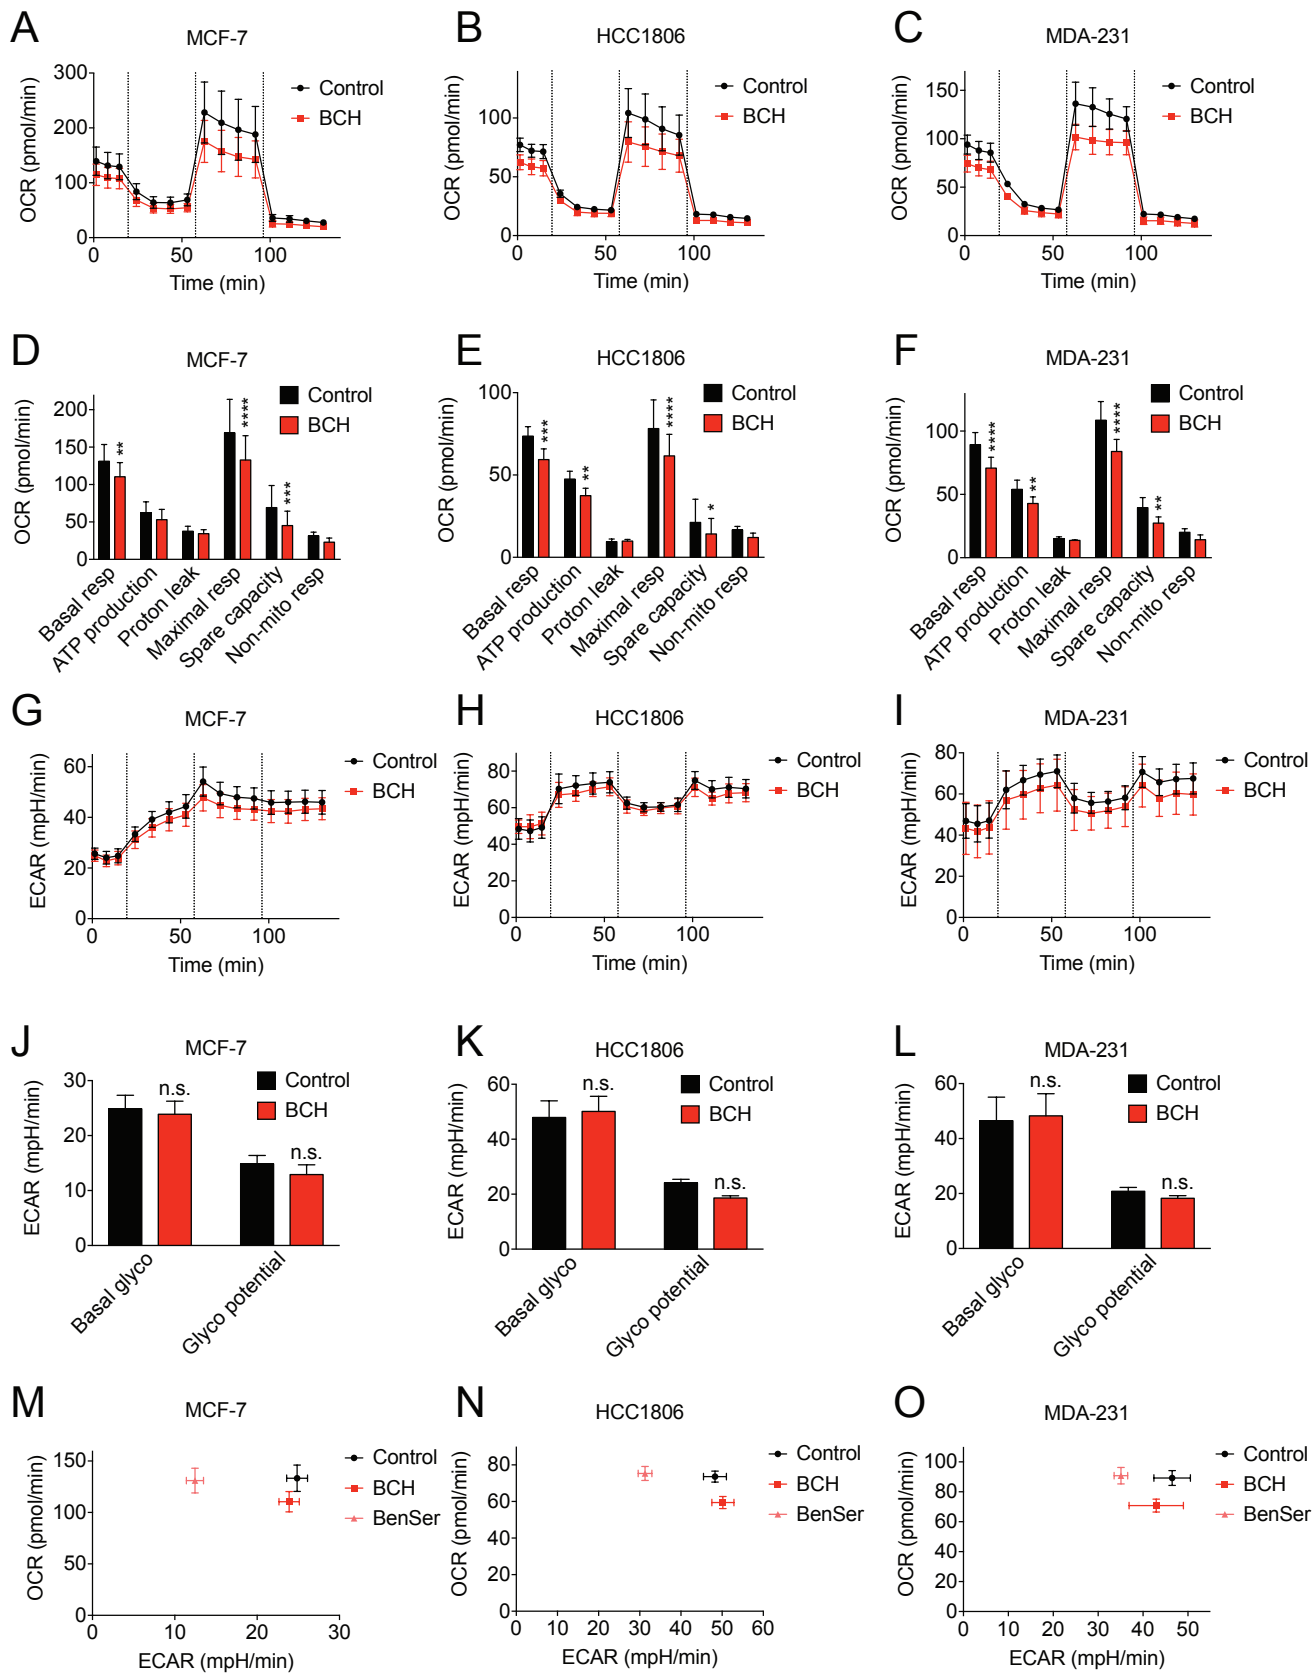

Supplement: 12885_2018_4599_MOESM2_ESM.pdf [file 12885_2018_4599_MOESM2_ESM.pdf]
